# Supplementary material for: Comparative analysis of swine leukocyte antigen gene diversity in European farmed pigs
Source: PubMed Central journal article supplement (PMC8362188; doi:10.1111/age.13090), 2021-05-24
Supplement: AGE-52-523-s001.pdf [file AGE-52-523-s001.pdf]

**Table S1** Detailed list of European farmed pigs incorporated in the present study.

| Breed       | origin  | no of pigs  |              | Reference                                                             |
|-------------|---------|-------------|--------------|-----------------------------------------------------------------------|
|             |         | SLA class I | SLA class II |                                                                       |
| ([LRxYS]xD) | DK      | 101         | 0            | Pedersen <i>et al.</i> Vet. Immunol. Immunopathol. (2014) 162:108-116 |
|             | NL      | 8           | 8            | Christine Jansen (2018, this study)                                   |
|             | UK      | 31          | 31           | William T. Golde (2019-20, this study)                                |
| ([LRxLW]xP) | Austria | 9           | 9            | Talker <i>et al.</i> Veterinary Research (2015) 46:52                 |
|             |         | 31          | 31           | Talker <i>et al.</i> Journal of Virology (2016) 90:9364-9382          |
|             |         | 8           | 8            | Sabine Hammer (2012, this study)                                      |
| LR x LW     | UK      | 26          | 8            | Franzoni <i>et al.</i> PLoS ONE (2013) 8:e84246                       |
|             |         | 10          | 10           | Mokhtar <i>et al.</i> Frontiers in Immunology (2016) 7:40             |
|             | Spain   | 26          | 26           | Burgara-Estrella <i>et al.</i> Viruses (2013) 5:663-677               |
|             |         | 73          | 73           | De León <i>et al.</i> Viruses (2020) 8:E513                           |
| YS x NL LR  | UK      | 22          | 22           | Mokhtar <i>et al.</i> Vaccine (2014) 32:6828-6837                     |
| YS x Ham    | Sweden  | 44          | 0            | Marianne Jensen-Waern (2015-16, this study)                           |
| YS          |         | 33          | 0            |                                                                       |
| GER LR      | Germany | 20          | 20           | Ulrike Gimsa (2012, this study)                                       |
|             |         | 65          | 65           | Gimsa <i>et al.</i> Immunogenetics (2017) 69:39-47                    |
| AUT P       | Austria | 27          | 27           | Essler <i>et al.</i> Animal Genetics (2013) 44:202-205                |
| LW          | UK      | 3           | 3            | Simon Graham (2012, this study)                                       |
|             | CH      | 12          | 0            | Artur Summerfield (2015, this study)                                  |
|             |         | <b>549</b>  | <b>341</b>   | <b>Total no of pigs</b>                                               |

LRYS/D, Animals were 25% Landrace (LR), 25% Yorkshire (YS), and 50% Duroc (D); LWLR/P, Animals were 25% Large White (LW), 25% Landrace (LR), and 50% Pietrain (P); LR x LW, Large White/Landrace crosses; YS x NL LR, Yorkshire/Dutch Landrace crosses; YS x Ham, Yorkshire/Hampshire crosses; GER LR, German Landrace; AUT P, Austrian Pietrain; LW, Large White.

**Table S1 – References**

- Pedersen L.E., Jungersen G., Sorensen M.R., Ho C.-S. & Vadkær D.F. (2014) Swine leukocyte antigen (SLA) class I allele typing of Danish swine herds and identification of commonly occurring haplotypes using sequence specific low and high resolution primers. *Veterinary Immunology and Immunopathology* 162, 108-16. <https://doi.org/10.1016/j.vetimm.2014.10.007>
- Talker S.C., Koinig H., Stadler M., Graage R., Klingler E., Ladinig A., Mair K.H., Hammer S.E., Dürrwald R., Ritzmann M., Saalmüller A. & Gerner W. (2015) Magnitude and kinetics of multifunctional CD4<sup>+</sup> and CD8<sup>+</sup> T cells in pigs infected with swine influenza A virus. *Veterinary Research* 46, 52-67. <https://doi.org/10.1186/s13567-015-0182-3>.
- Talker S.C., Stadler M., Koinig H.C., Mair K.H., Rodriguez-Gomez I.M., Graage R., Zell R., Dürrwald R., Starick E., Harder T., Weissenböck H., Lamp B., Hammer S.E., Ladinig A., Saalmüller A. & Gerner W. (2016) Influenza A virus infection in pigs attracts multifunctional and cross-reactive T cells to the lung. *Journal of Virology* 90, 9364-82. <https://doi.org/10.1128/JVI.01211-16>.
- Franzoni G., Kurkure N.V., Essler S.E., Everett H.E., Bodman-Smith K., Crooke H.R. & Graham S.P. (2013) Proteome-wide screening reveals immunodominance in the CD8 T cell response against classical swine fever virus with antigen-specificity dependant on MHC class I haplotype. *PLoS One* 8, e84246. <https://doi.org/10.1371/journal.pone.0084246>
- Mokhtar H., Pedrera M., Frossard J.P., Biffar L., Choudhury B., Hammer S.E., Kvisgaard L.K., Larsen L.E., Stewart G.R., Somaravarapu S., Steinbach F. & Graham S.P. (2016) The non-structural protein 5 and matrix protein are major antigenic targets of T cell immunity to porcine reproductive and respiratory syndrome virus. *Frontiers in Immunology* 7, 40. <https://doi.org/10.3389/fimmu.2016.00040>.
- Burgara-Estrella A., Díaz I., Rodríguez-Gómez I., Essler S.E., Hernández J. & Mateu E. (2013) Predicted peptides from non-structural proteins of porcine reproductive and respiratory syndrome virus are able to induce INF- $\gamma$  and IL-10. *Viruses* 5, 663-677. <https://doi.org/10.3390/v5020663>
- De León P., Cañas-Arranz R., Saez Y., Forner M., Defaus S., Bustos M.J., Torres E., Rodríguez-Pulido M., Andreu D., Blanco E., Sobrino F. & Hammer S.E. (2020) Association of porcine Swine Leukocyte Antigen (SLA) haplotypes with B- and T-cell immune response to foot-and-mouth disease virus (FMDV) peptides. Special issue: Evaluation of Vaccine Immunogenicity, *Vaccines (Basel)* 8, E513. <https://doi.org/10.3390/vaccines8030513>.
- Mokhtar H., Eck M., Morgan S.B., Essler S.E., Frossard J.P., Ruggli N. & Graham S.P. (2014) Proteome-wide screening of the European porcine reproductive and respiratory syndrome virus reveals a broad range of T cell antigen reactivity. *Vaccine* 32, 6828-37. <https://doi.org/10.1016/j.vaccine.2014.04.054>
- Gimsa U., Ho C.S. & Hammer S.E. (2017) Preferred SLA class I/class II haplotype combinations in German Landrace pigs. *Immunogenetics* 69, 39-47. <https://doi.org/10.1007/s00251-016-0946-6>.
- Essler S.E., Ertl W., Deutsch J., Ruetgen B.C., Groiss S., Stadler M., Wysoudil B., Gerner W., Ho C.-S. & Saalmüller A. (2013) Molecular characterization of swine leukocyte antigen gene diversity in purebred Pietrain pigs. *Animal Genetics* 44, 202-205. <https://doi.org/10.1111/j.1365-2052.2012.02375.x>

**Table S2a** Plate layout of the PCR primer panel for genotyping swine leukocyte antigen (SLA) class I alleles.

|   | H                                | G                                   | F                           | E                                   | D                               | C                                                                | B                                                   | A                                                  |
|---|----------------------------------|-------------------------------------|-----------------------------|-------------------------------------|---------------------------------|------------------------------------------------------------------|-----------------------------------------------------|----------------------------------------------------|
| 1 | Negative                         | 209 bp                              | 147 bp                      | 181 bp                              | 220 bp                          | 163 bp                                                           | 220 bp                                              | 138 bp                                             |
|   | Control                          | SLA-1*01XX(all)                     | SLA-1*02XX(all)             | SLA-1*04XX(all)                     | SLA-1*05XX(all);<br>SLA-1*16:02 | SLA-1*06XX(all);<br>SLA-1*13:01                                  | SLA-1*07XX(all)                                     | SLA-1*08XX(all)                                    |
| 2 | 195 bp                           | 180 bp                              | 182 bp                      | 119 bp                              | 211 bp                          | 219 bp                                                           | 253 bp                                              | 173 bp                                             |
|   | SLA-1*09XX(all)                  | SLA-1*10XX(all)                     | SLA-1*11XX(all)             | SLA-1*12XX(all)                     | SLA-1*13XX(all)                 | SLA-1*14XX(all)                                                  | SLA-1*15XX(all);<br>SLA-1*14:02;<br>SLA-2*01XX(all) | SLA-1*16XX(all)                                    |
| 3 | 134 bp                           | 208 bp                              | 193 bp                      | 130 bp                              | 196 bp                          | 177 bp                                                           | 183 bp                                              | 192 bp                                             |
|   | SLA-1*16XX(all);<br>SLA-1*16:02; | SLA-1*17:01                         | SLA-1*07:03;<br>SLA-2*11:04 | SLA-1*07:03;<br>SLA-1*07:05         | SLA-1*18:01                     | SLA-3*01XX(all)                                                  | SLA-3*03XX(all);<br>SLA-3*08XX(all)                 | SLA-3*04XX(all);<br>SLA-3*04:04<br>SLA-2*15XX(all) |
|   | SLA-2*03XX(all);<br>SLA-2*11:04  |                                     |                             |                                     |                                 |                                                                  |                                                     |                                                    |
| 4 | 138 bp                           | 187 bp                              | 152 bp                      | 152 bp                              | 139 bp                          | 139 bp                                                           | 172 bp                                              | 138 bp                                             |
|   | SLA-3*05XX(all)                  | SLA-3*06XX(all);<br>SLA-3*07XX(all) | SLA-3*07XX(all)             | SLA-3*06:01                         | SLA-3*06:02                     | SLA-1*11:03;<br>SLA-3*04XX(all); 04:04<br>SLA-3*03XX excl. 03:06 | SLA-2*01XX(all)                                     | SLA-2*02XX(all)                                    |
| 5 | 89 bp                            | 311 bp                              | 127 bp                      | 125 bp                              | 199 bp                          | 126 bp                                                           | 177 bp                                              | 104 bp                                             |
|   | SLA-2*03XX(all)                  | SLA-2*04XX(all)                     | SLA-2*05XX(all)             | SLA-2*06XX(all)                     | SLA-2*07XX(all)                 | SLA-2*08XX(all)                                                  | SLA-2*09XX(all)                                     | SLA-2*10XX(all)                                    |
| 6 | 123 bp                           | 160 bp                              | 117 bp                      | 131 bp                              | 90 bp                           | 196 bp                                                           | 138 bp                                              | 175 bp                                             |
|   | SLA-2*11XX(all)                  | SLA-1*14:02;                        | SLA-1*11:03;                | SLA-1*09XX(all);                    | SLA-2*15XX(all);                | SLA-2*06:01~02 / 06:06;                                          | SLA-1*07XX(all)                                     | SLA-2*16:02                                        |
|   |                                  | SLA-2*12XX(all)                     | SLA-2*13XX(all)             | SLA-2*14XX(all)<br>16XX(all); 16:02 | SLA-2*11:04                     | 09:01/09:02; 16XX(all)                                           | SLA-2*02XX(all)<br>SLA-2*16XX(all);<br>SLA-2*17:01  |                                                    |

Reference: Ho *et al.* Animal Genetics (2009) 40:468-78. <https://doi.org/10.1111/j.1365-2052.2009.01860.x>.

**Table S2b** Plate layout of the PCR primer panel for genotyping swine leukocyte antigen (SLA) class II alleles.

|    | H                | G                | F                | E                | D                | C                  | B                | A                |
|----|------------------|------------------|------------------|------------------|------------------|--------------------|------------------|------------------|
| 7  | <b>Negative</b>  | <b>162 bp</b>    | <b>203 bp</b>    | <b>115 bp</b>    | <b>180 bp</b>    | <b>206 bp</b>      | <b>172 bp</b>    | <b>122 bp</b>    |
|    | <b>Control</b>   | DRB1*01XX(all)   | DRB1*01XX(all)   | DRB1*02XX(all)   | DRB1*03XX(all)   | DRB1*04XX(all)     | DRB1*05XX(all)   | DRB1*06XX(all)   |
|    |                  | DRB1*13:02/01:03 | DRB1*13:02       |                  |                  |                    |                  |                  |
|    |                  | DRB1*01:04/07:04 | DRB1*01:04/01:05 |                  |                  |                    |                  |                  |
| 8  | <b>133 bp</b>    | <b>108 bp</b>    | <b>105 bp</b>    | <b>157 bp</b>    | <b>135 bp</b>    | <b>109 bp</b>      | <b>186 bp</b>    | <b>182 bp</b>    |
|    | DRB1*07XX(all)   | DRB1*08XX(all)   | DRB1*09XX(all)   | DRB1*09XX(all)   | DRB1*10XX(all)   | DRB1*11XX(all)     | DRB1*12XX(all)   | DRB1*13XX(all)   |
|    |                  | DRB1*03:02       | DRB1*09:05/09:06 | DRB1*16:02/17:01 | DRB1*10:06/10:07 |                    |                  |                  |
|    |                  | DRB1*16:01/16:03 | DRB1*09:04       | DRB1*09:06/09:07 |                  |                    |                  |                  |
| 9  | <b>113 bp</b>    | <b>160 bp</b>    | <b>134 bp</b>    | <b>202 bp</b>    | <b>197 bp</b>    | <b>117 bp</b>      | <b>160 bp</b>    | <b>118 bp</b>    |
|    | DRB1*14XX(all)   | DRB1*14:02       | DRB1*15:01       | DRB1*17:01       | DRB1*10:07/10:08 | DRB1*04:03~04      | DRB1*04:01~02    | DRB1*04:01~02    |
|    |                  |                  |                  | DRB1*15:02       | DRB1*09:07       | DRB1*11:01/11:03   | DRB1*04:05/04:06 | DRB1*04:05/04:06 |
|    |                  |                  |                  | DRB1*15:03       |                  | DRB1*14:02         |                  |                  |
| 10 | <b>165 bp</b>    | <b>180 bp</b>    | <b>146 bp</b>    | <b>166 bp</b>    | <b>197 bp</b>    | <b>193 bp</b>      | <b>204 bp</b>    | <b>154 bp</b>    |
|    | DQB1*01XX(all)   | DQB1*01XX(all)   | DQB1*02XX(all)   | DQB1*03XX(all)   | DQB1*04XX(all)   | DQB1*05XX(all)     | DQB1*06XX(all)   | DQB1*07XX(all)   |
|    |                  | DQB1*11:01       |                  |                  |                  |                    | DQB1*06:03       |                  |
| 11 | <b>148 bp</b>    | <b>146 bp</b>    | <b>180 bp</b>    | <b>161 bp</b>    | <b>193 bp</b>    | <b>176 bp</b>      | <b>133 bp</b>    | <b>165 bp</b>    |
|    | DQB1*08XX(all)   | DQB1*09XX(all)   | DQB1*09XX(all)   | DQB1*10:01       | DQB1*02XX        | DQB1*02:02 / 02:06 | DQB1*02XX        | DQB1*02:03/02:06 |
|    | DQB1*08:06       |                  | DQB1*03:04       | DQB1*10:02       | DQB1*03:04/08:06 |                    |                  | DQB1*03:01       |
| 12 | <b>173 bp</b>    | <b>141 bp</b>    | <b>210 bp</b>    | <b>160 bp</b>    | <b>124 bp</b>    | <b>148 bp</b>      | <b>111 bp</b>    | <b>120 bp</b>    |
|    | DQB1*02:02/02:04 | DQA*01XX(all)    | DQA*02XX(all)    | DQA*03XX(all)    | DQA*04XX(all)    | DQA*04XX(all)      | DQA*05XX(all)    | DQA*06:01        |
|    | DQB1*08:06       |                  | DQA*06:01        |                  |                  |                    |                  |                  |

Reference: Ho *et al.* Animal Genetics (2010) 41:428-32. <https://doi.org/10.1111/j.1365-2052.2010.02019.x>.

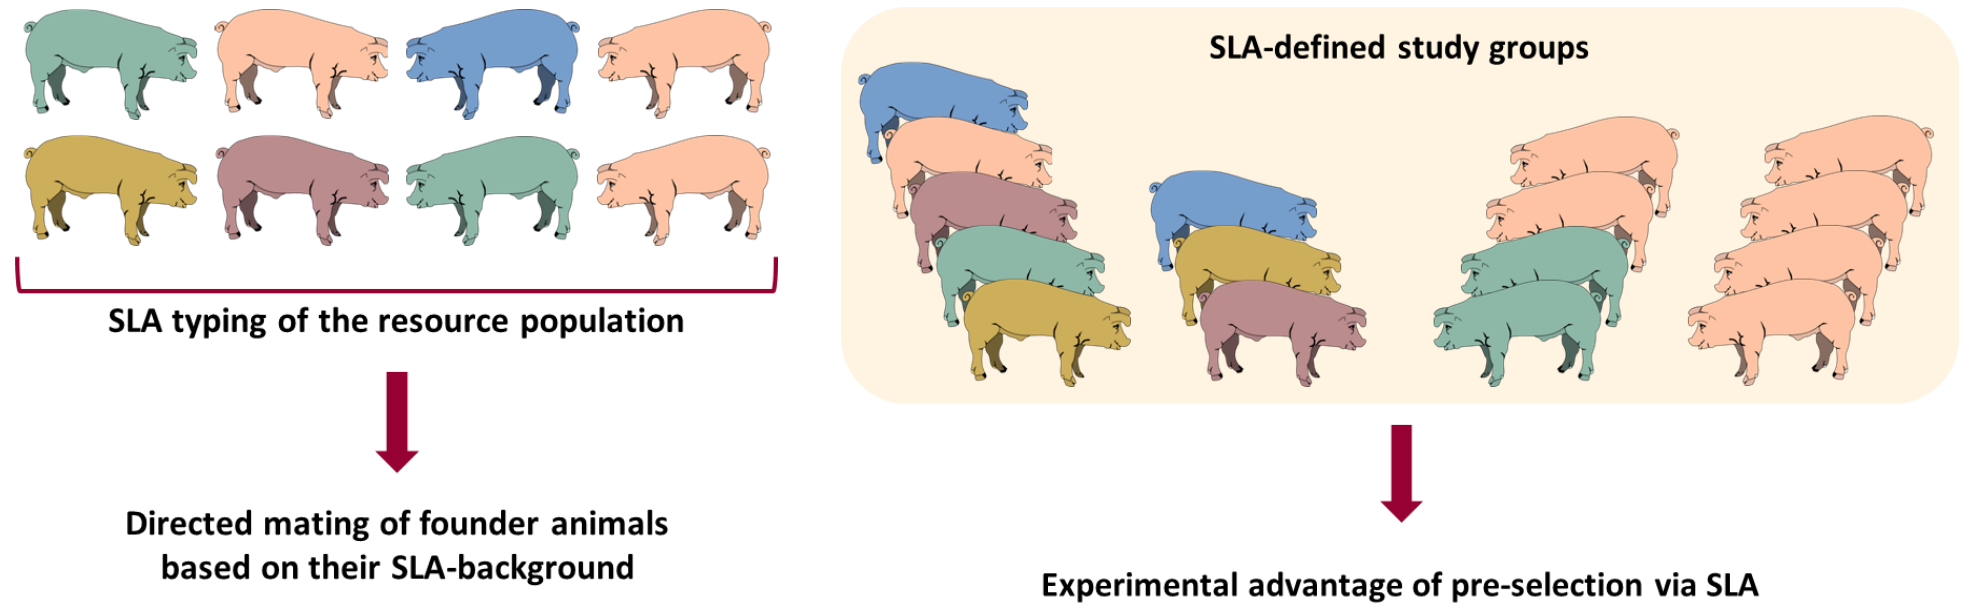

**Figure S1** Two basics concepts for Swine leukocyte antigen (SLA) haplotyping-assisted animal trials in vaccine and transplantation research.

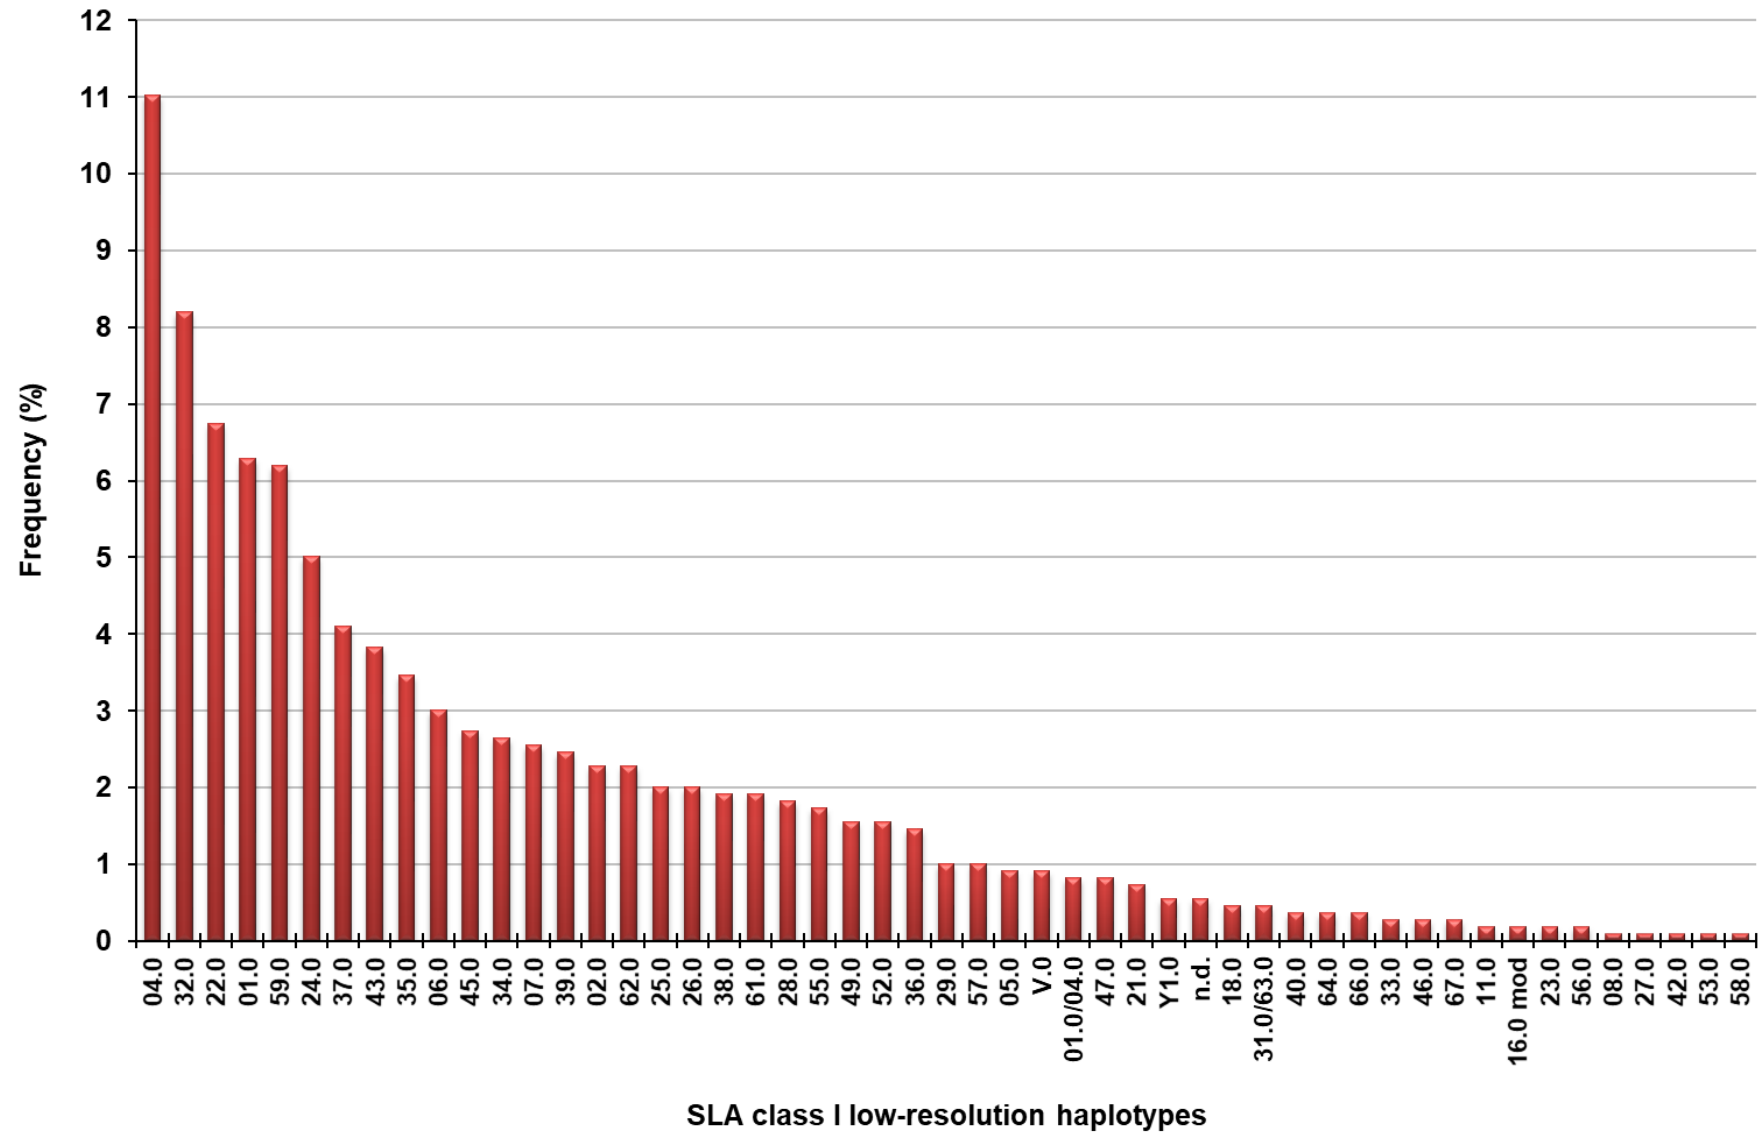

**Figure S2a** Frequency of swine leukocyte antigen (SLA) class I low-resolution haplotypes identified in 549 European farmed pigs.

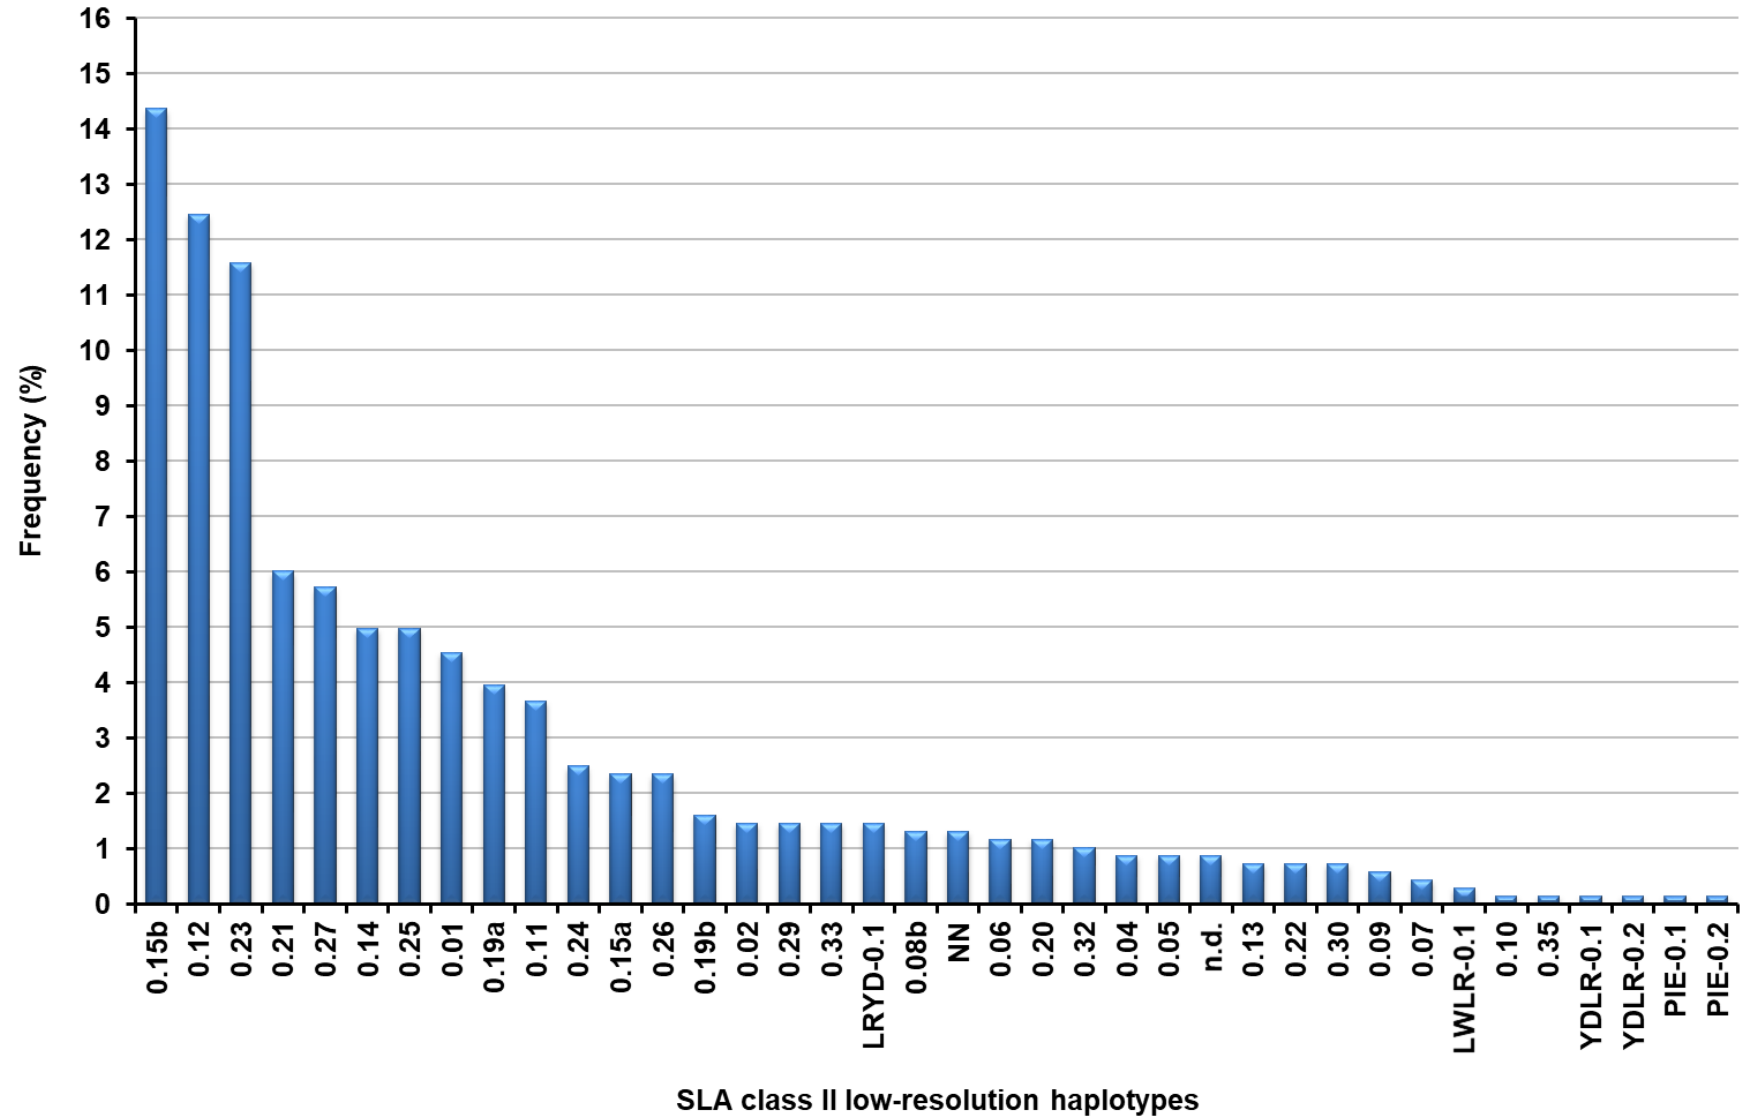

**Figure S2b** Frequency of swine leukocyte antigen (SLA) class II low-resolution haplotypes identified in 341 European farmed pigs.

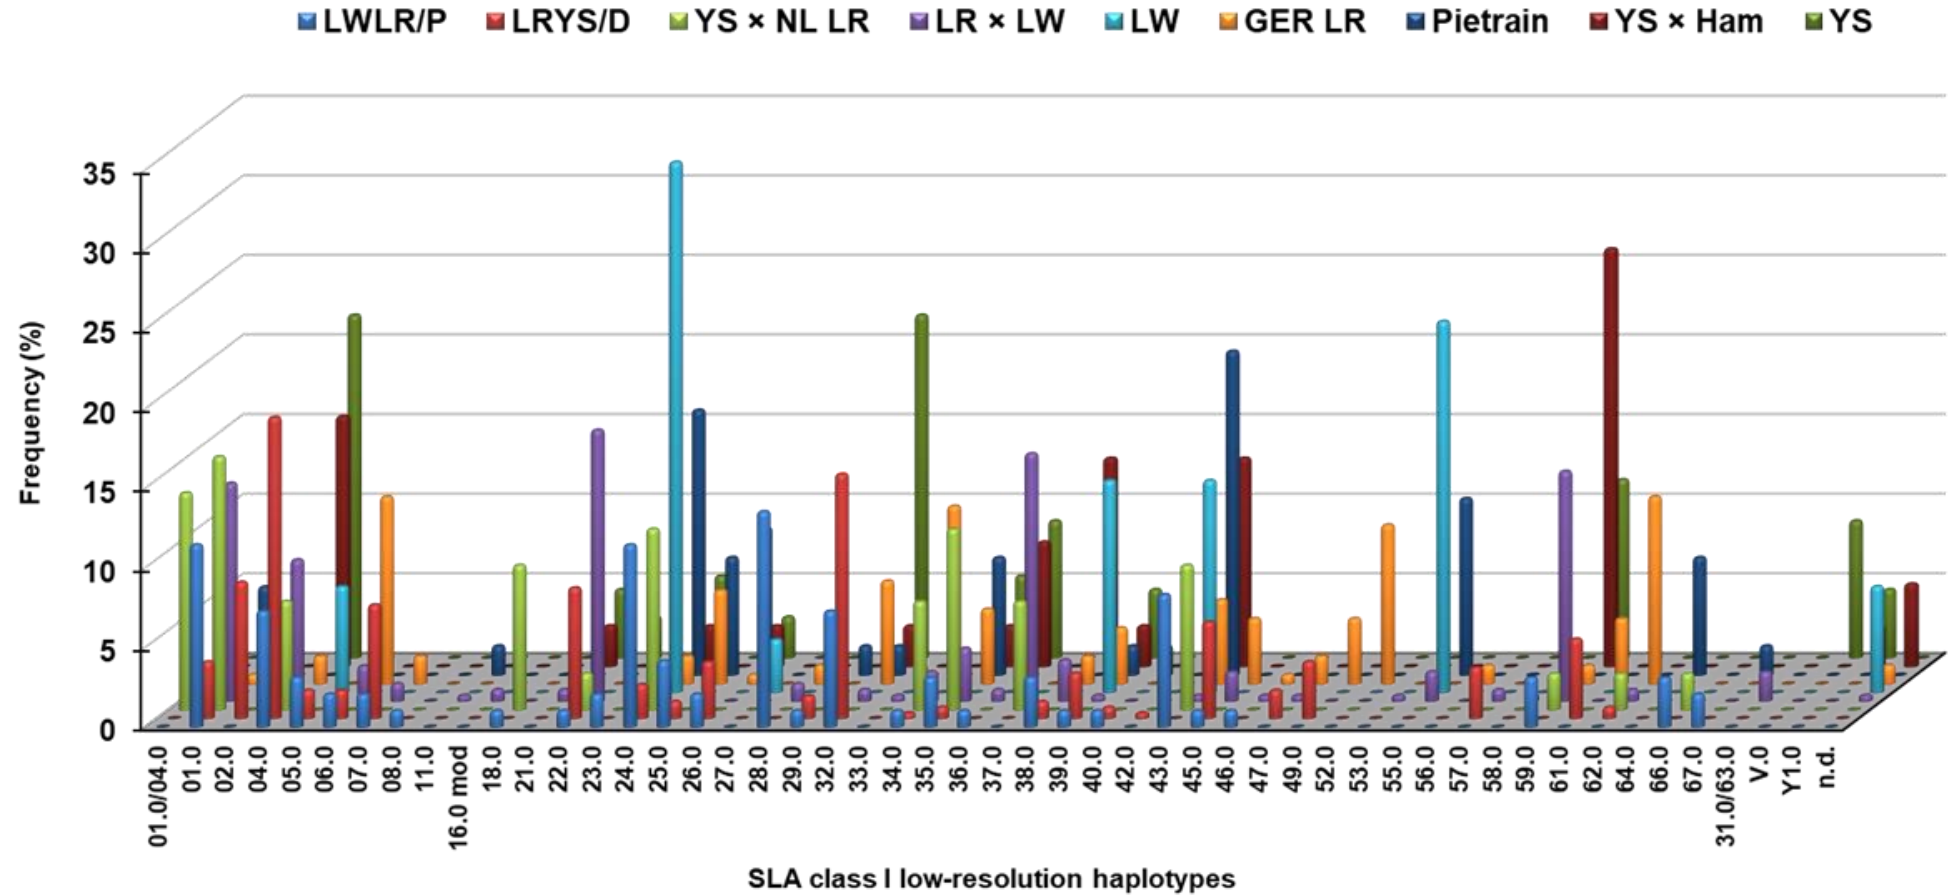

**Figure S3a** Swine leukocyte antigen (SLA) class I low-resolution haplotype diversity in nine European commercial pig populations. LWLR/P, Animals were 25% Large White (LW), 25% Landrace (LR), and 50% Pietrain (P); LRYS/D, Animals were 25% Landrace (LR), 25% Yorkshire (YS), and 50% Duroc (D); YS x NL LR, Yorkshire/ Dutch Landrace crosses; LR x LW, Large White/Landrace crosses; GER LR, German Landrace; YS x Ham, Yorkshire/Hampshire crosses.



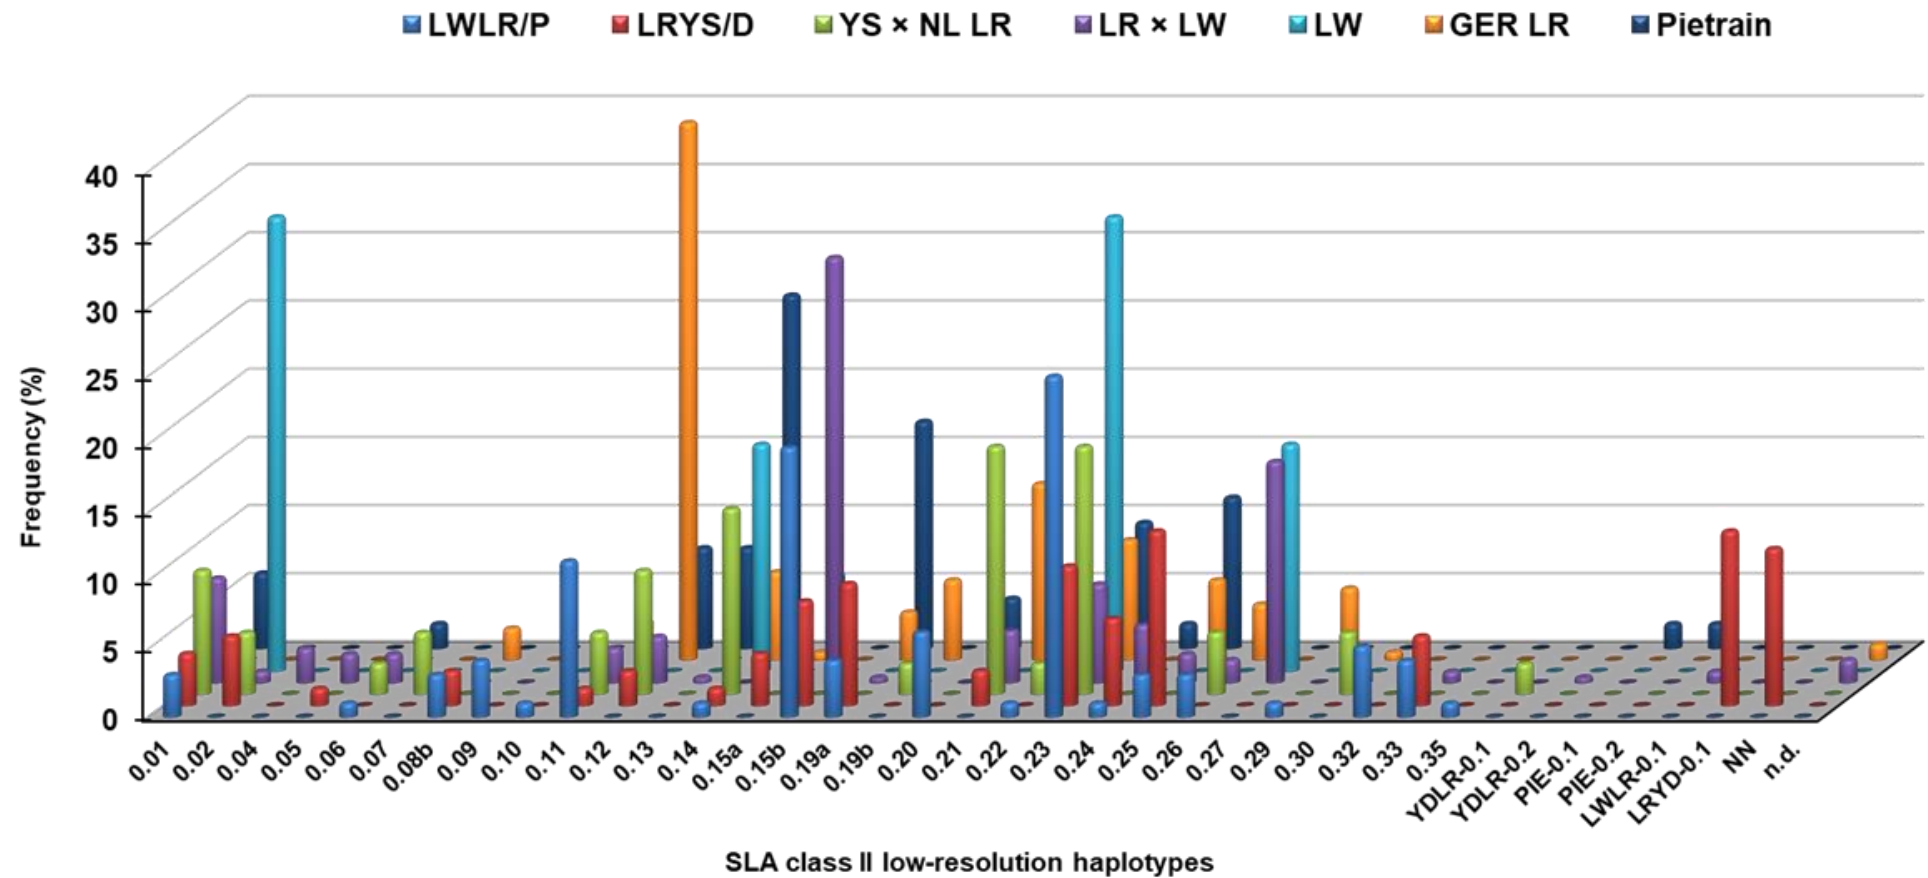

**Figure S3b** Swine leukocyte antigen (SLA) class II low-resolution haplotype diversity in seven European commercial pig populations. LWLR/P, Animals were 25% Large White (LW), 25% Landrace (LR), and 50% Pietrain (P); LRYS/D, Animals were 25% Landrace (LR), 25% Yorkshire (YS), and 50% Duroc (D); YS x NL LR, Yorkshire/ Dutch Landrace crosses; LR x LW, Large White/Landrace crosses; GER LR, German Landrace.
